# Supplementary material for: Length and GC Content Variability of Introns among Teleostean Genomes in the Light of the Metabolic Rate Hypothesis
Source: PubMed Central journal article supplement (PMC4122358; doi:10.1371/journal.pone.0103889), 2014-08-05
Supplement: pone.0103889.s001.pdf [file pone.0103889.s001.pdf]

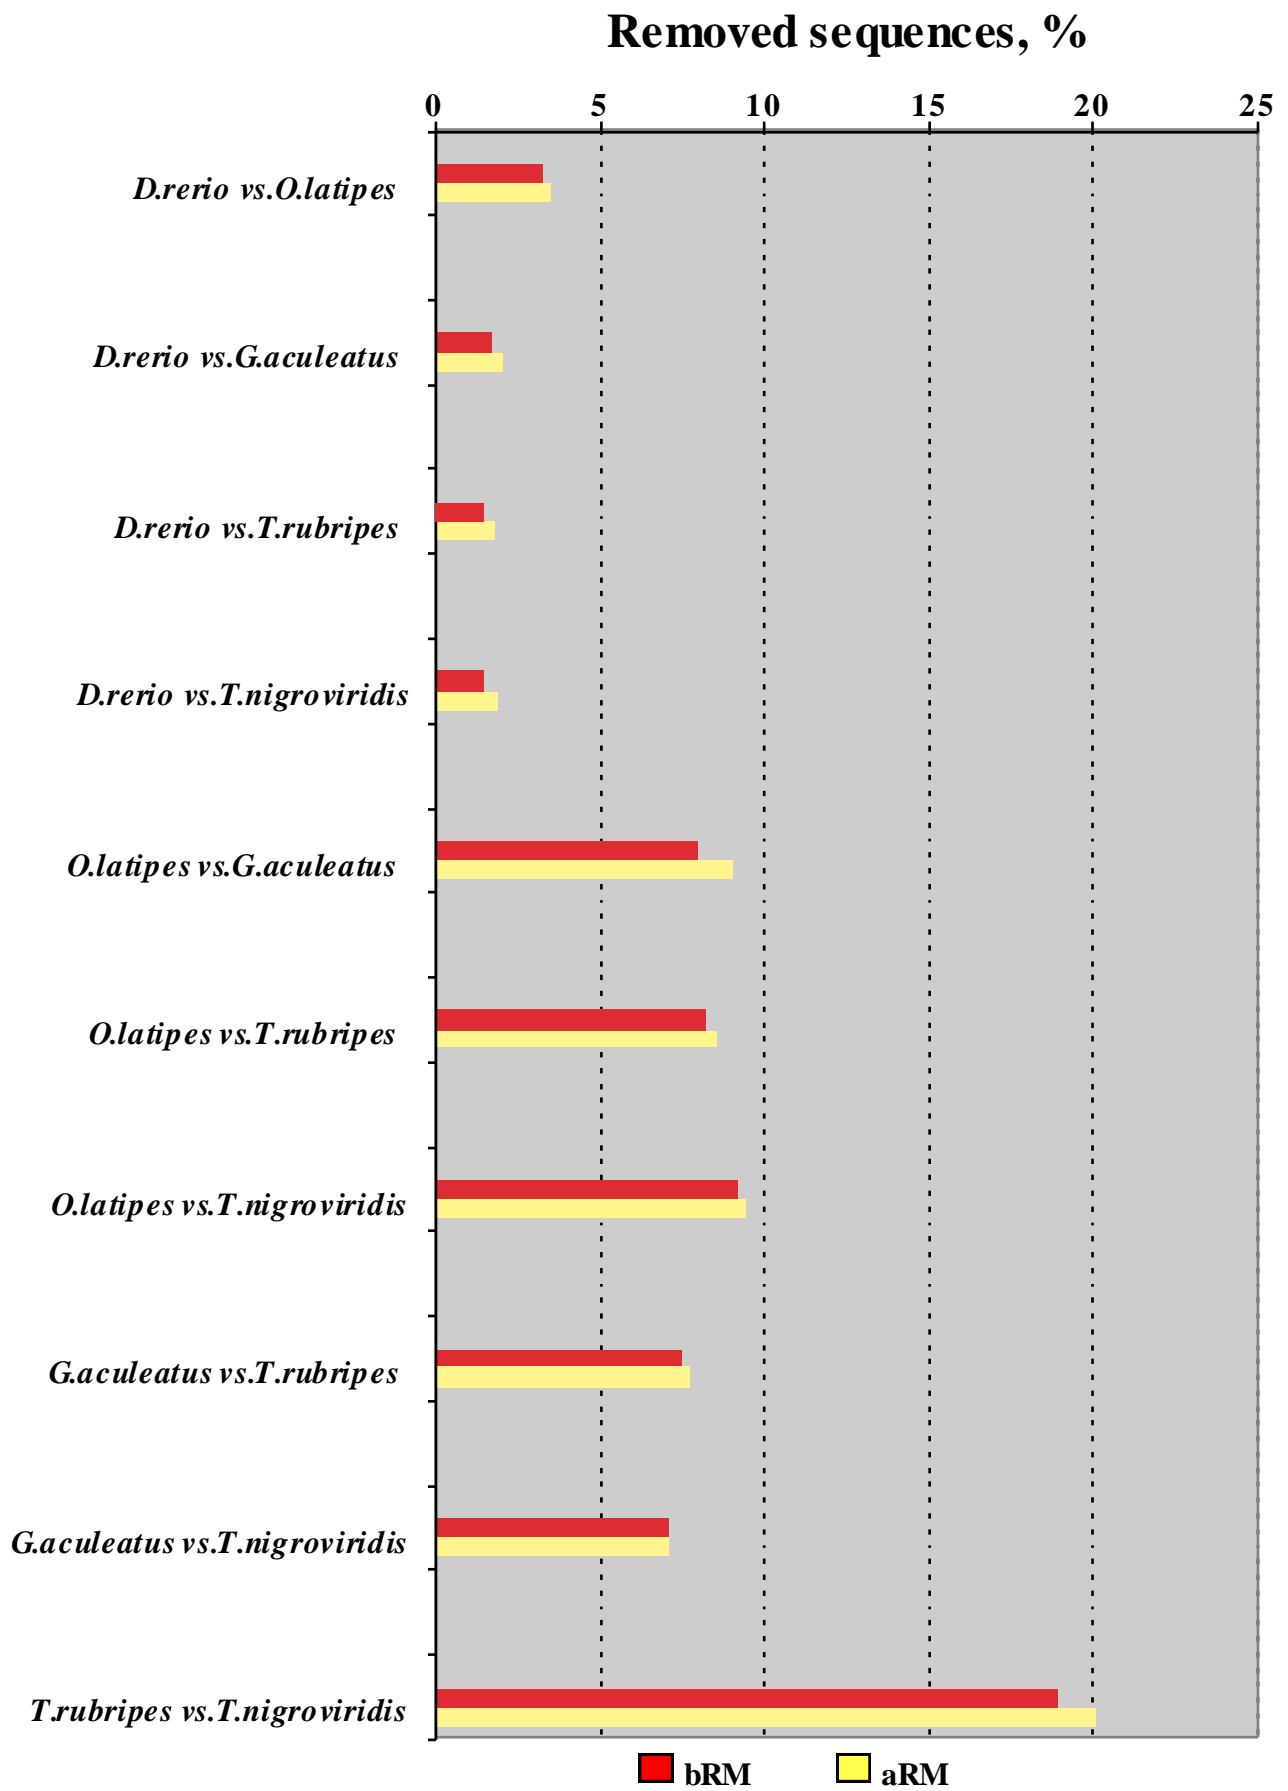

**Fig. S1**
