# Supplementary material for: Length and GC Content Variability of Introns among Teleostean Genomes in the Light of the Metabolic Rate Hypothesis
Source: PubMed Central journal article supplement (PMC4122358; doi:10.1371/journal.pone.0103889), 2014-08-05
Supplement: pone.0103889.s002.pdf [file pone.0103889.s002.pdf]

**Table S1. Descriptive Statistics of GCi distribution.**

|                        | <b>Mean</b> | <b>Std. Dev.</b> | <b>Count</b> | <b>Range</b> | <b>Median</b> | <b>Skewness</b> |
|------------------------|-------------|------------------|--------------|--------------|---------------|-----------------|
| <i>D. rerio</i>        | 0.365       | 0.041            | 13521        | 0.557        | 0.362         | 1.741           |
| <i>O. latipes</i>      | 0.396       | 0.054            | 5779         | 0.455        | 0.388         | 1.058           |
| <i>G. aculeatus</i>    | 0.429       | 0.052            | 5862         | 0.572        | 0.424         | 0.743           |
| <i>T. rubripes</i>     | 0.441       | 0.052            | 13870        | 0.489        | 0.437         | 0.581           |
| <i>T. nigroviridis</i> | 0.472       | 0.074            | 8905         | 0.542        | 0.463         | 0.590           |
