# Supplementary material for: Length and GC Content Variability of Introns among Teleostean Genomes in the Light of the Metabolic Rate Hypothesis
Source: PubMed Central journal article supplement (PMC4122358; doi:10.1371/journal.pone.0103889), 2014-08-05
Supplement: pone.0103889.s003.pdf [file pone.0103889.s003.pdf]

**Table S2. Skewness of GCi % in each set of orthologous introns before RepeatMasker**

|                        | <i>D. rerio</i> | <i>O. latipes</i> | <i>G. aculeatus</i> | <i>T. rubripes</i> | <i>T. nigroviridis</i> |
|------------------------|-----------------|-------------------|---------------------|--------------------|------------------------|
| <i>D. rerio</i>        | -               | 0.473             | 0.375               | 0.457              | 0.499                  |
| <i>O. latipes</i>      | 1.143           | -                 | 1.114               | 1.094              | 1.054                  |
| <i>G. aculeatus</i>    | 0.602           | 0.656             | -                   | 0.569              | 0.789                  |
| <i>T. rubripes</i>     | 0.493           | 0.556             | 0.524               | -                  | 0.430                  |
| <i>T. nigroviridis</i> | 0.579           | 0.753             | 0.674               | 0.648              | -                      |
