# Supplementary material for: Length and GC Content Variability of Introns among Teleostean Genomes in the Light of the Metabolic Rate Hypothesis
Source: PubMed Central journal article supplement (PMC4122358; doi:10.1371/journal.pone.0103889), 2014-08-05
Supplement: pone.0103889.s004.pdf [file pone.0103889.s004.pdf]

**Table S3. Physiological parameters**

|                        | <b>lnMR</b> | <b>°C</b> | <b>S (‰)</b> |
|------------------------|-------------|-----------|--------------|
| <i>D. rerio</i>        | 31.178      | 18-24     | 0-25         |
| <i>O. latipes</i>      | 31.587      | 18-24     | 0-35         |
| <i>G. aculeatus</i>    | 31.937      | 4-20      | 0-35         |
| <i>T. rubripes</i>     | 32.033      | 15-20     | 14-35        |
| <i>T. nigroviridis</i> | 31.637      | 24-28     | 0-35         |

**MR = metabolic rate temperature-corrected by the Boltzmann's factor**

**°C and S = environmental ranges of temperature and salinity**
