# Supplementary material for: Length and GC Content Variability of Introns among Teleostean Genomes in the Light of the Metabolic Rate Hypothesis
Source: PubMed Central journal article supplement (PMC4122358; doi:10.1371/journal.pone.0103889), 2014-08-05
Supplement: pone.0103889.s005.pdf [file pone.0103889.s005.pdf]

**TableS4. Binomial test**

<http://www.vassarstats.net/>

| Pairwise species                  | Before RepeatMasker |      |     |     |
|-----------------------------------|---------------------|------|-----|-----|
|                                   | N/P                 | N/N  | P/N | P/P |
| <i>D.rerio/O.latipes</i>          | 2036                | 519  | 43  | 276 |
| <i>D.rerio/G.aculeatus</i>        | 5043                | 188  | 34  | 438 |
| <i>D.rerio/T.rubripes</i>         | 4871                | 241  | 26  | 213 |
| <i>D.rerio/T.nigroviridis</i>     | 4135                | 183  | 14  | 141 |
| <i>O.latipes/G.aculeatus</i>      | 1561                | 312  | 349 | 984 |
| <i>O.latipes/T.rubripes</i>       | 1702                | 441  | 197 | 482 |
| <i>O.latipes/T.nigroviridis</i>   | 1763                | 305  | 106 | 409 |
| <i>G.aculeatus/T.rubripes</i>     | 2689                | 2123 | 652 | 502 |
| <i>G.aculeatus/T.nigroviridis</i> | 3132                | 1305 | 262 | 378 |
| <i>T.rubripes/T.nigroviridis</i>  | 2536                | 823  | 478 | 564 |

  

|                                   | N/P + N/N | N/P + P/N | N/P + P/P |
|-----------------------------------|-----------|-----------|-----------|
| <i>D.rerio/O.latipes</i>          | 2555      | 2079      | 2312      |
| <i>D.rerio/G.aculeatus</i>        | 5231      | 5077      | 5481      |
| <i>D.rerio/T.rubripes</i>         | 5112      | 4897      | 5084      |
| <i>D.rerio/T.nigroviridis</i>     | 4318      | 4149      | 4276      |
| <i>O.latipes/G.aculeatus</i>      | 1873      | 1910      | 2545      |
| <i>O.latipes/T.rubripes</i>       | 2143      | 1899      | 2184      |
| <i>O.latipes/T.nigroviridis</i>   | 2068      | 1869      | 2172      |
| <i>G.aculeatus/T.rubripes</i>     | 4812      | 3341      | 3191      |
| <i>G.aculeatus/T.nigroviridis</i> | 4437      | 3394      | 3510      |
| <i>T.rubripes/T.nigroviridis</i>  | 3359      | 3014      | 3100      |

  

|                                   | N/P vs N/N | N/P vs P/N | N/P vs P/P |
|-----------------------------------|------------|------------|------------|
| <i>D.rerio/O.latipes</i>          | 0.000001   | 0.000001   | 0.000001   |
| <i>D.rerio/G.aculeatus</i>        | 0.000001   | 0.000001   | 0.000001   |
| <i>D.rerio/T.rubripes</i>         | 0.000001   | 0.000001   | 0.000001   |
| <i>D.rerio/T.nigroviridis</i>     | 0.000001   | 0.000001   | 0.000001   |
| <i>O.latipes/G.aculeatus</i>      | 0.000001   | 0.000001   | 0.000001   |
| <i>O.latipes/T.rubripes</i>       | 0.000001   | 0.000001   | 0.000001   |
| <i>O.latipes/T.nigroviridis</i>   | 0.000001   | 0.000001   | 0.000001   |
| <i>G.aculeatus/T.rubripes</i>     | 0.000001   | 0.000001   | 0.000001   |
| <i>G.aculeatus/T.nigroviridis</i> | 0.000001   | 0.000001   | 0.000001   |
| <i>T.rubripes/T.nigroviridis</i>  | 0.000001   | 0.000001   | 0.000001   |

  

|                                   | p <sub>a</sub> -values | p <sub>b</sub> -values | p <sub>c</sub> -values | p-values * |
|-----------------------------------|------------------------|------------------------|------------------------|------------|
| <i>D.rerio/O.latipes</i>          | 0.000001               | 0.000001               | 0.000001               | 0.00003    |
| <i>D.rerio/G.aculeatus</i>        | 0.000001               | 0.000001               | 0.000001               | 0.00003    |
| <i>D.rerio/T.rubripes</i>         | 0.000001               | 0.000001               | 0.000001               | 0.00003    |
| <i>D.rerio/T.nigroviridis</i>     | 0.000001               | 0.000001               | 0.000001               | 0.00003    |
| <i>O.latipes/G.aculeatus</i>      | 0.000001               | 0.000001               | 0.000001               | 0.00003    |
| <i>O.latipes/T.rubripes</i>       | 0.000001               | 0.000001               | 0.000001               | 0.00003    |
| <i>O.latipes/T.nigroviridis</i>   | 0.000001               | 0.000001               | 0.000001               | 0.00003    |
| <i>G.aculeatus/T.rubripes</i>     | 0.000001               | 0.000001               | 0.000001               | 0.00003    |
| <i>G.aculeatus/T.nigroviridis</i> | 0.000001               | 0.000001               | 0.000001               | 0.00003    |
| <i>T.rubripes/T.nigroviridis</i>  | 0.000001               | 0.000001               | 0.000001               | 0.00003    |

\* p-values Bonferroni- corrected

| Pairwise species                  | After RepeatMasker |      |     |     |
|-----------------------------------|--------------------|------|-----|-----|
|                                   | N/P                | N/N  | P/N | P/P |
| <i>D.rerio/O.latipes</i>          | 1768               | 764  | 93  | 241 |
| <i>D.rerio/G.aculeatus</i>        | 4692               | 487  | 53  | 453 |
| <i>D.rerio/T.rubripes</i>         | 4505               | 579  | 38  | 209 |
| <i>D.rerio/T.nigroviridis</i>     | 3928               | 371  | 18  | 135 |
| <i>O.latipes/G.aculeatus</i>      | 1559               | 296  | 342 | 996 |
| <i>O.latipes/T.rubripes</i>       | 1705               | 451  | 197 | 460 |
| <i>O.latipes/T.nigroviridis</i>   | 1768               | 304  | 108 | 397 |
| <i>G.aculeatus/T.rubripes</i>     | 2644               | 2218 | 625 | 463 |
| <i>G.aculeatus/T.nigroviridis</i> | 3168               | 1281 | 267 | 360 |
| <i>T.rubripes/T.nigroviridis</i>  | 2569               | 758  | 474 | 538 |

  

|                                   | N/P + N/N | N/P + P/N | N/P + P/P |
|-----------------------------------|-----------|-----------|-----------|
| <i>D.rerio/O.latipes</i>          | 2532      | 1861      | 2009      |
| <i>D.rerio/G.aculeatus</i>        | 5179      | 4745      | 5145      |
| <i>D.rerio/T.rubripes</i>         | 5084      | 4543      | 4714      |
| <i>D.rerio/T.nigroviridis</i>     | 4299      | 3946      | 4063      |
| <i>O.latipes/G.aculeatus</i>      | 1855      | 1901      | 2555      |
| <i>O.latipes/T.rubripes</i>       | 2156      | 1902      | 2165      |
| <i>O.latipes/T.nigroviridis</i>   | 2072      | 1876      | 2165      |
| <i>G.aculeatus/T.rubripes</i>     | 4862      | 3269      | 3107      |
| <i>G.aculeatus/T.nigroviridis</i> | 4449      | 3435      | 3528      |
| <i>T.rubripes/T.nigroviridis</i>  | 3327      | 3043      | 3107      |

  

|                                   | N/P vs N/N | N/P vs P/N | N/P vs P/P |
|-----------------------------------|------------|------------|------------|
| <i>D.rerio/O.latipes</i>          | 0.000001   | 0.000001   | 0.000001   |
| <i>D.rerio/G.aculeatus</i>        | 0.000001   | 0.000001   | 0.000001   |
| <i>D.rerio/T.rubripes</i>         | 0.000001   | 0.000001   | 0.000001   |
| <i>D.rerio/T.nigroviridis</i>     | 0.000001   | 0.000001   | 0.000001   |
| <i>O.latipes/G.aculeatus</i>      | 0.000001   | 0.000001   | 0.000001   |
| <i>O.latipes/T.rubripes</i>       | 0.000001   | 0.000001   | 0.000001   |
| <i>O.latipes/T.nigroviridis</i>   | 0.000001   | 0.000001   | 0.000001   |
| <i>G.aculeatus/T.rubripes</i>     | 0.000001   | 0.000001   | 0.000001   |
| <i>G.aculeatus/T.nigroviridis</i> | 0.000001   | 0.000001   | 0.000001   |
| <i>T.rubripes/T.nigroviridis</i>  | 0.000001   | 0.000001   | 0.000001   |

  

|                                   | p <sub>a</sub> -values | p <sub>b</sub> -values | p <sub>c</sub> -values | p-values * |
|-----------------------------------|------------------------|------------------------|------------------------|------------|
| <i>D.rerio/O.latipes</i>          | 0.000001               | 0.000001               | 0.000001               | 0.00003    |
| <i>D.rerio/G.aculeatus</i>        | 0.000001               | 0.000001               | 0.000001               | 0.00003    |
| <i>D.rerio/T.rubripes</i>         | 0.000001               | 0.000001               | 0.000001               | 0.00003    |
| <i>D.rerio/T.nigroviridis</i>     | 0.000001               | 0.000001               | 0.000001               | 0.00003    |
| <i>O.latipes/G.aculeatus</i>      | 0.000001               | 0.000001               | 0.000001               | 0.00003    |
| <i>O.latipes/T.rubripes</i>       | 0.000001               | 0.000001               | 0.000001               | 0.00003    |
| <i>O.latipes/T.nigroviridis</i>   | 0.000001               | 0.000001               | 0.000001               | 0.00003    |
| <i>G.aculeatus/T.rubripes</i>     | 0.000001               | 0.000001               | 0.000001               | 0.00003    |
| <i>G.aculeatus/T.nigroviridis</i> | 0.000001               | 0.000001               | 0.000001               | 0.00003    |
| <i>T.rubripes/T.nigroviridis</i>  | 0.000001               | 0.000001               | 0.000001               | 0.00003    |

\* p-values Bonferroni- corrected
